# Supplementary material
Source: Springer Nature journal article supplement (https://www.springermedizin.de/resource/supplementary/13256_2009_1383_MOESM1_ESM.pdf/9647780)

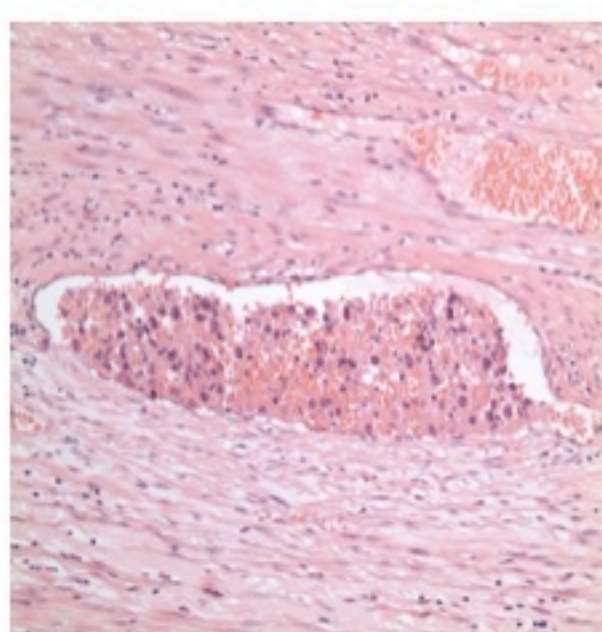

Fig 1a

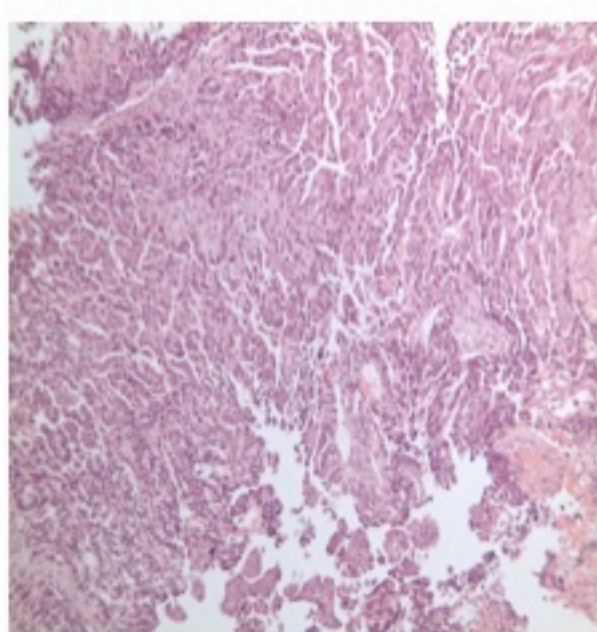

Fig 1b

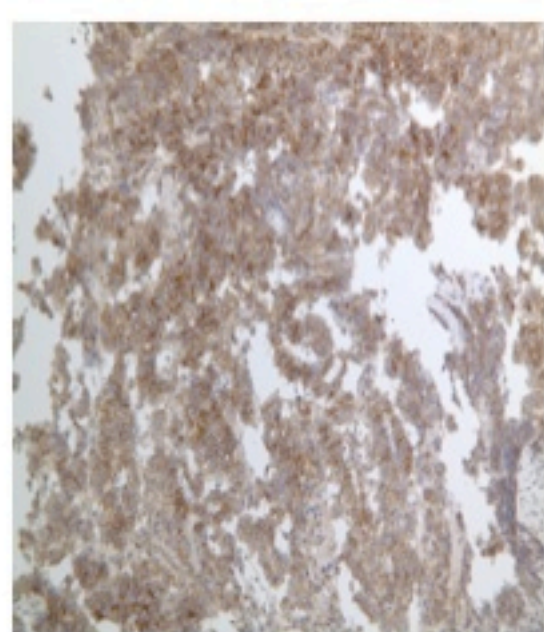

Fig 1c

Supplement: MOESM1 [file 9647780]
